# Supplementary material
Source: Springer Nature journal article supplement (https://www.springermedizin.de/resource/supplementary/12883_2010_408_MOESM4_ESM.pdf/9455276)

a) 3-month

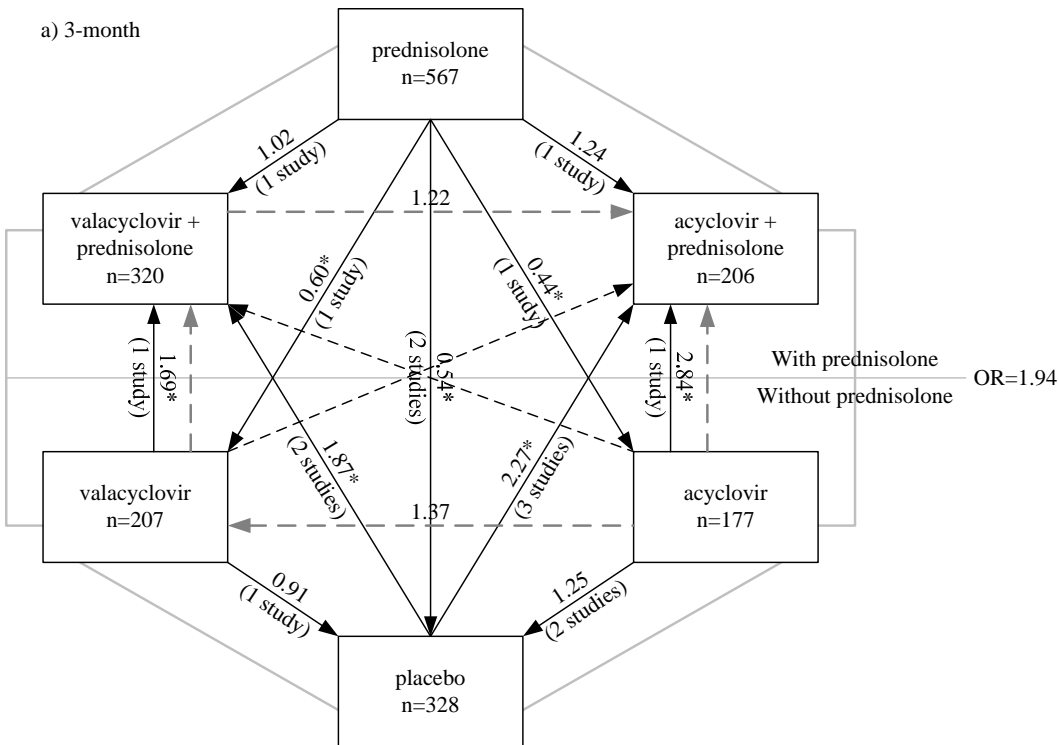

b) >3-month

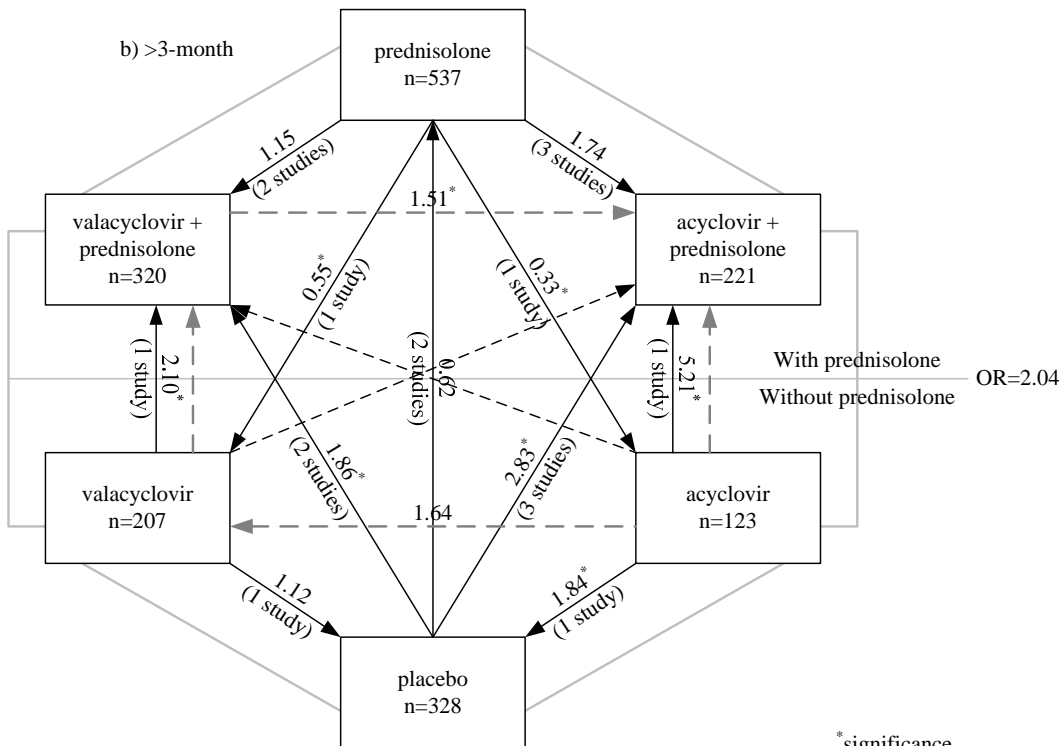

\*significance

Supplement: MOESM4 [file 9455276]
